# Supplementary material for: The Rap activator Gef26 regulates synaptic growth and neuronal survival via inhibition of BMP signaling
Source: PubMed Central journal article supplement (PMC5745669; doi:10.1186/s13041-017-0342-7), 2017-12-28
Supplement: 13041_2017_342_MOESM1_ESM.pdf [file 13041_2017_342_MOESM1_ESM.pdf]

**Table S1. Quantification of NMJ parameters for experiments in Fig. 1B.**

|                                                       | Number of samples | Bouton number     | p value vs WT | Muscle area ( $\mu\text{m}^2$ ) $\times 10^{-3}$ | p value vs WT | Bouton number /Muscle area ( $\#/\mu\text{m}^2$ ) $\times 10^3$ | p value vs WT | Satellite bouton number | p value vs WT |
|-------------------------------------------------------|-------------------|-------------------|---------------|--------------------------------------------------|---------------|-----------------------------------------------------------------|---------------|-------------------------|---------------|
| <b>NMJ6/7</b>                                         |                   |                   |               |                                                  |               |                                                                 |               |                         |               |
| <i>w<sup>1118</sup></i> (WT)                          | 20                | 118.90 $\pm$ 1.81 |               | 88.67 $\pm$ 1.48                                 |               | 1.35 $\pm$ 0.03                                                 |               | 14.10 $\pm$ 0.67        |               |
| <i>gef26<sup>6</sup>/gef26<sup>6</sup></i>            | 14                | 148.07 $\pm$ 2.16 | <0.001        | 86.20 $\pm$ 1.77                                 | 1.731         | 1.72 $\pm$ 0.03                                                 | <0.001        | 20.14 $\pm$ 0.80        | <0.001        |
| <i>gef26<sup>6</sup>/Df</i>                           | 21                | 145.05 $\pm$ 1.77 | <0.001        | 85.88 $\pm$ 1.45                                 | 1.349         | 1.69 $\pm$ 0.03                                                 | <0.001        | 18.19 $\pm$ 0.65        | 0.001         |
| <i>C155-GAL4/+; gef26<sup>6</sup>/Df; UAS-gef26/+</i> | 21                | 116.24 $\pm$ 1.77 | <0.001        | 89.14 $\pm$ 1.45                                 | 0.895         | 1.30 $\pm$ 0.03                                                 | 0.901         | 12.90 $\pm$ 0.65        | 0.774         |
| <i>gef26<sup>6</sup>/Df; BG57-GAL4/UAS-gef26</i>      | 17                | 144.41 $\pm$ 1.96 | <0.001        | 87.30 $\pm$ 1.61                                 | 0.721         | 1.66 $\pm$ 0.03                                                 | <0.001        | 19.41 $\pm$ 0.72        | <0.001        |
| <b>NMJ4</b>                                           |                   |                   |               |                                                  |               |                                                                 |               |                         |               |
| <i>w<sup>1118</sup></i> (WT)                          | 11                | 15.82 $\pm$ 0.66  |               | 35.47 $\pm$ 1.02                                 |               | 0.45 $\pm$ 0.01                                                 |               | 2.55 $\pm$ 0.41         |               |
| <i>gef26<sup>6</sup>/Df</i>                           | 10                | 23.10 $\pm$ 0.69  | <0.001        | 33.94 $\pm$ 1.07                                 | <0.001        | 0.68 $\pm$ 0.01                                                 | <0.001        | 8.10 $\pm$ 0.43         | <0.001        |
