# Supplementary material for: The Rap activator Gef26 regulates synaptic growth and neuronal survival via inhibition of BMP signaling
Source: PubMed Central journal article supplement (PMC5745669; doi:10.1186/s13041-017-0342-7), 2017-12-28
Supplement: 13041_2017_342_MOESM3_ESM.pdf [file 13041_2017_342_MOESM3_ESM.pdf]

**Table S2. Quantification of NMJ parameters for experiments in Fig. S1B.**

|                                                | <b>Number of samples</b> | <b>Bouton number</b> | p value vs <i>C155-GAL4/+</i> | <b>Muscle area (<math>\mu\text{m}^2</math>)<math>\times 10^{-3}</math></b> | p value vs <i>C155-GAL4/+</i> | <b>Bouton number /Muscle area (<math>\#/\mu\text{m}^2</math>)<math>\times 10^3</math></b> | p value vs <i>C155-GAL4/+</i> | <b>Satellite bouton number</b> | p value vs <i>C155-GAL4/+</i> |
|------------------------------------------------|--------------------------|----------------------|-------------------------------|----------------------------------------------------------------------------|-------------------------------|-------------------------------------------------------------------------------------------|-------------------------------|--------------------------------|-------------------------------|
| <i>C155-GAL4/+</i>                             | 12                       | 120.67 $\pm$ 2.48    |                               | 90.79 $\pm$ 1.59                                                           |                               | 1.33 $\pm$ 0.03                                                                           |                               | 13.25 $\pm$ 0.52               |                               |
| <i>C155-GAL4/+; UAS-gef26<sup>RNAi</sup>/+</i> | 13                       | 149.62 $\pm$ 2.38    | <0.001                        | 90.47 $\pm$ 1.53                                                           | 0.851                         | 1.65 $\pm$ 0.03                                                                           | <0.001                        | 20.69 $\pm$ 0.50               | <0.001                        |
|                                                |                          |                      | p value vs <i>BG57-GAL4/+</i> |                                                                            | p value vs <i>BG57-GAL4/+</i> |                                                                                           | p value vs <i>BG57-GAL4/+</i> |                                | p value vs <i>BG57-GAL4/+</i> |
| <i>BG57-GAL4/+</i>                             | 14                       | 117.43 $\pm$ 3.03    |                               | 90.07 $\pm$ 1.33                                                           |                               | 1.30 $\pm$ 0.03                                                                           |                               | 13.43 $\pm$ 0.64               |                               |
| <i>BG57-GAL4/UAS-gef26<sup>RNAi</sup></i>      | 12                       | 116.92 $\pm$ 2.52    | 0.901                         | 91.30 $\pm$ 1.49                                                           | 0.561                         | 1.28 $\pm$ 0.03                                                                           | 0.654                         | 13.17 $\pm$ 0.70               | 0.794                         |
