# Supplementary material for: The Rap activator Gef26 regulates synaptic growth and neuronal survival via inhibition of BMP signaling
Source: PubMed Central journal article supplement (PMC5745669; doi:10.1186/s13041-017-0342-7), 2017-12-28
Supplement: 13041_2017_342_MOESM4_ESM.pdf [file 13041_2017_342_MOESM4_ESM.pdf]

**Table S3. Quantification of NMJ parameters for experiments in Fig. 2B.**

|                                                                              | Number of samples | Bouton number     | p value vs WT | Muscle area ( $\mu\text{m}^2$ ) $\times 10^{-3}$ | p value vs WT | Bouton number /Muscle area ( $\#/\mu\text{m}^2$ ) $\times 10^3$ | p value vs WT | Satellite bouton number | p value vs WT |
|------------------------------------------------------------------------------|-------------------|-------------------|---------------|--------------------------------------------------|---------------|-----------------------------------------------------------------|---------------|-------------------------|---------------|
| <i>w<sup>1118</sup></i> (WT)                                                 | 10                | 127.67 $\pm$ 3.55 |               | 92.93 $\pm$ 0.93                                 |               | 1.37 $\pm$ 0.03                                                 |               | 13.78 $\pm$ 0.72        |               |
| <i>rap1<sup>M</sup>/rap1<sup>M</sup></i>                                     | 18                | 157.67 $\pm$ 2.51 | <0.001        | 90.44 $\pm$ 0.66                                 | 0.857         | 1.74 $\pm$ 0.02                                                 | <0.001        | 20.67 $\pm$ 0.51        | <0.001        |
| <i>gef26<sup>6</sup>/+</i>                                                   | 12                | 130.83 $\pm$ 3.21 | 1             | 91.50 $\pm$ 0.84                                 | 0.997         | 1.43 $\pm$ 0.03                                                 | 0.996         | 13.50 $\pm$ 0.65        | 1             |
| <i>rap1<sup>M</sup>/+</i>                                                    | 12                | 133.00 $\pm$ 3.21 | 0.993         | 90.38 $\pm$ 0.84                                 | 0.899         | 1.48 $\pm$ 0.03                                                 | 0.873         | 13.50 $\pm$ 0.65        | 1             |
| <i>gef26<sup>6</sup>/+; rap1<sup>M</sup>/+</i>                               | 14                | 170.40 $\pm$ 5.67 | <0.001        | 90.15 $\pm$ 1.01                                 | 0.796         | 1.89 $\pm$ 0.07                                                 | <0.001        | 21.07 $\pm$ 1.09        | <0.001        |
| <i>C155-GAL4/+</i>                                                           | 10                | 128.40 $\pm$ 3.42 | 1             | 92.78 $\pm$ 0.64                                 | 1             | 1.38 $\pm$ 0.03                                                 | 1             | 13.80 $\pm$ 0.90        | 1             |
| <i>C155-GAL4/+; UAS-Myc-<i>rap1<sup>CA</sup></i>/+</i>                       | 15                | 96.33 $\pm$ 2.79  | <0.001        | 91.06 $\pm$ 0.52                                 | 0.975         | 1.06 $\pm$ 0.03                                                 | <0.001        | 8.53 $\pm$ 0.74         | 0.003         |
| <i>gef26<sup>6</sup>/Df</i>                                                  | 14                | 148.01 $\pm$ 2.85 | 0.019         | 85.21 $\pm$ 0.74                                 | 0.006         | 1.72 $\pm$ 0.03                                                 | <0.001        | 20.14 $\pm$ 0.58        | <0.001        |
| <i>C155-GAL4/+; gef26<sup>6</sup>/Df; UAS-Myc-<i>rap1<sup>CA</sup></i>/+</i> | 15                | 102.13 $\pm$ 2.36 | <0.001        | 90.37 $\pm$ 0.50                                 | 0.859         | 1.13 $\pm$ 0.02                                                 | 0.017         | 9.53 $\pm$ 0.26         | 0.036         |
