# Supplementary material for: The Rap activator Gef26 regulates synaptic growth and neuronal survival via inhibition of BMP signaling
Source: PubMed Central journal article supplement (PMC5745669; doi:10.1186/s13041-017-0342-7), 2017-12-28
Supplement: 13041_2017_342_MOESM6_ESM.pdf [file 13041_2017_342_MOESM6_ESM.pdf]

**Table S4. Quantification of NMJ parameters for experiments in Fig. S2B.**

|                                                   | Number of samples | Bouton number     | p value vs C155-GAL4/+ | Muscle area ( $\mu\text{m}^2$ ) $\times 10^{-3}$ | p value vs C155-GAL4/+ | Bouton number /Muscle area ( $\#/\mu\text{m}^2$ ) $\times 10^3$ | p value vs C155-GAL4/+ | Satellite bouton number | p value vs C155-GAL4/+ |
|---------------------------------------------------|-------------------|-------------------|------------------------|--------------------------------------------------|------------------------|-----------------------------------------------------------------|------------------------|-------------------------|------------------------|
| C155-GAL4/+                                       | 14                | 128.93 $\pm$ 2.58 |                        | 91.83 $\pm$ 1.31                                 |                        | 1.41 $\pm$ 0.03                                                 |                        | 13.14 $\pm$ 0.57        |                        |
| C155-GAL4/+; UAS- <i>rap1</i> <sup>RNAi1</sup> /+ | 17                | 171.00 $\pm$ 4.27 | <0.001                 | 94.03 $\pm$ 1.28                                 | 0.753                  | 1.82 $\pm$ 0.05                                                 | <0.001                 | 20.94 $\pm$ 0.81        | <0.001                 |
| C155-GAL4/+; UAS- <i>rap1</i> <sup>RNAi2</sup> /+ | 11                | 184.36 $\pm$ 2.90 | <0.001                 | 95.44 $\pm$ 1.47                                 | 0.359                  | 1.93 $\pm$ 0.04                                                 | <0.001                 | 19.73 $\pm$ 0.65        | <0.001                 |
|                                                   |                   |                   | p value vs BG57-GAL4/+ |                                                  | p value vs BG57-GAL4/+ |                                                                 | p value vs BG57-GAL4/+ |                         | p value vs BG57-GAL4/+ |
| BG57-GAL4/+                                       | 10                | 124.00 $\pm$ 5.71 |                        | 88.99 $\pm$ 1.04                                 |                        | 1.39 $\pm$ 0.07                                                 |                        | 12.89 $\pm$ 1.13        |                        |
| BG57-GAL4/UAS- <i>rap1</i> <sup>RNAi1</sup>       | 11                | 107.82 $\pm$ 5.14 | 0.249                  | 84.64 $\pm$ 1.84                                 | 0.507                  | 1.27 $\pm$ 0.04                                                 | 0.920                  | 11.91 $\pm$ 0.90        | 0.920                  |
| BG57-GAL4/UAS- <i>rap1</i> <sup>RNAi2</sup>       | 17                | 129.47 $\pm$ 5.12 | 0.244                  | 91.88 $\pm$ 0.95                                 | 0.294                  | 1.41 $\pm$ 0.05                                                 | 0.963                  | 14.00 $\pm$ 0.74        | 0.839                  |
