# Supplementary material for: The Rap activator Gef26 regulates synaptic growth and neuronal survival via inhibition of BMP signaling
Source: PubMed Central journal article supplement (PMC5745669; doi:10.1186/s13041-017-0342-7), 2017-12-28
Supplement: 13041_2017_342_MOESM7_ESM.pdf [file 13041_2017_342_MOESM7_ESM.pdf]

**Table S5. Quantification of NMJ parameters for experiments in Fig. 3.**

**Fig. 3B**

|                                                             | Number of samples | Bouton number     | p value vs WT | Muscle area ( $\mu\text{m}^2$ ) $\times 10^{-3}$ | p value vs WT | Bouton number /Muscle area ( $\#/\mu\text{m}^2$ ) $\times 10^3$ | p value vs WT | Satellite bouton number | p value vs WT |
|-------------------------------------------------------------|-------------------|-------------------|---------------|--------------------------------------------------|---------------|-----------------------------------------------------------------|---------------|-------------------------|---------------|
| <i>w</i> <sup>1118</sup> (WT)                               | 11                | 117.45 $\pm$ 2.09 |               | 89.90 $\pm$ 0.55                                 |               | 1.31 $\pm$ 0.02                                                 |               | 13.18 $\pm$ 0.70        |               |
| <i>gef26</i> <sup>6</sup> /+                                | 11                | 116.54 $\pm$ 2.30 | 1             | 90.73 $\pm$ 0.35                                 | 0.999         | 1.28 $\pm$ 0.02                                                 | 0.999         | 12.09 $\pm$ 0.71        | 0.956         |
| <i>rap1</i> <sup>M</sup> /+                                 | 11                | 120.90 $\pm$ 2.42 | 0.939         | 90.86 $\pm$ 0.33                                 | 0.997         | 1.33 $\pm$ 0.03                                                 | 0.999         | 13.60 $\pm$ 0.82        | 0.999         |
| <i>dad</i> <sup>J1E4</sup> /+                               | 10                | 117.40 $\pm$ 5.60 | 1             | 90.57 $\pm$ 0.42                                 | 1             | 1.30 $\pm$ 0.06                                                 | 1             | 13.00 $\pm$ 1.26        | 1             |
| <i>gef26</i> <sup>6</sup> /+; <i>dad</i> <sup>J1E4</sup> /+ | 11                | 147.18 $\pm$ 2.92 | 0.868         | 90.24 $\pm$ 2.44                                 | 1             | 1.64 $\pm$ 0.05                                                 | <0.001        | 18.09 $\pm$ 1.00        | 0.004         |
| <i>rap1</i> <sup>M</sup> ,+/+; <i>dad</i> <sup>J1E4</sup>   | 12                | 162.00 $\pm$ 3.70 | <0.001        | 89.26 $\pm$ 1.01                                 | 1             | 1.82 $\pm$ 0.06                                                 | <0.001        | 22.83 $\pm$ 0.99        | <0.001        |

**Fig. 3D**

|                                                                           | Number of samples | Bouton number     | p value vs WT | Muscle area ( $\mu\text{m}^2$ ) $\times 10^{-3}$ | p value vs WT | Bouton number /Muscle area ( $\#/\mu\text{m}^2$ ) $\times 10^3$ | p value vs WT | Satellite bouton number | p value vs WT |
|---------------------------------------------------------------------------|-------------------|-------------------|---------------|--------------------------------------------------|---------------|-----------------------------------------------------------------|---------------|-------------------------|---------------|
| <i>w</i> <sup>1118</sup> (WT)                                             | 12                | 120.75 $\pm$ 2.53 | 1             | 87.05 $\pm$ 3.46                                 | 1             | 1.40 $\pm$ 0.08                                                 | 1             | 14.33 $\pm$ 1.14        | 1             |
| <i>gef26</i> <sup>6</sup> /Df                                             | 10                | 146.20 $\pm$ 4.77 | <0.001        | 81.57 $\pm$ 3.03                                 | 0.150         | 1.81 $\pm$ 0.08                                                 | <0.001        | 18.80 $\pm$ 1.27        | 0.014         |
| <i>tkv</i> <sup>7</sup> /+                                                | 10                | 125.30 $\pm$ 1.96 | 0.990         | 89.78 $\pm$ 0.80                                 | 0.887         | 1.39 $\pm$ 0.01                                                 | 1             | 12.70 $\pm$ 0.40        | 0.901         |
| <i>tkv</i> <sup>7</sup> , <i>gef26</i> <sup>6</sup> /+,Df                 | 15                | 110.60 $\pm$ 2.93 | <0.001        | 89.93 $\pm$ 2.93                                 | 0.053         | 1.23 $\pm$ 0.04                                                 | 0.132         | 12.20 $\pm$ 0.69        | 0.901         |
| <i>tkv</i> <sup>1</sup> /tkv <sup>7</sup>                                 | 13                | 88.69 $\pm$ 3.87  | <0.001        | 92.77 $\pm$ 0.87                                 | 0.071         | 0.96 $\pm$ 0.04                                                 | <0.001        | 6.69 $\pm$ 0.65         | <0.001        |
| <i>tkv</i> <sup>7</sup> , <i>gef26</i> <sup>6</sup> /tkv <sup>1</sup> ,Df | 15                | 85.73 $\pm$ 3.62  | <0.001        | 92.79 $\pm$ 0.60                                 | <0.001        | 0.92 $\pm$ 0.04                                                 | <0.001        | 4.67 $\pm$ 0.53         | <0.001        |
| <i>rap1</i> <sup>M</sup> /rap1 <sup>M</sup>                               | 18                | 157.56 $\pm$ 2.42 | <0.001        | 90.44 $\pm$ 2.29                                 | 0.223         | 1.74 $\pm$ 0.05                                                 | <0.001        | 20.39 $\pm$ 1.07        | <0.001        |
| <i>tkv</i> <sup>7</sup> /+; <i>rap1</i> <sup>M</sup> /rap1 <sup>M</sup>   | 14                | 123.07 $\pm$ 4.80 | <0.001        | 92.02 $\pm$ 0.33                                 | <0.001        | 1.33 $\pm$ 0.05                                                 | 0.970         | 13.93 $\pm$ 1.21        | 1             |
