# Supplementary material for: The Rap activator Gef26 regulates synaptic growth and neuronal survival via inhibition of BMP signaling
Source: PubMed Central journal article supplement (PMC5745669; doi:10.1186/s13041-017-0342-7), 2017-12-28
Supplement: 13041_2017_342_MOESM8_ESM.pdf [file 13041_2017_342_MOESM8_ESM.pdf]

Table S6. Quantification of NMJ parameters for experiments in Fig. 4.

Fig. 4B

|                                                                                | Number of samples | Bouton number     | p value vs WT | Muscle area ( $\mu\text{m}^2$ ) $\times 10^{-3}$ | p value vs WT | Bouton number /Muscle area ( $\#/\mu\text{m}^2$ ) $\times 10^3$ | p value vs WT | Satellite bouton number | p value vs WT |
|--------------------------------------------------------------------------------|-------------------|-------------------|---------------|--------------------------------------------------|---------------|-----------------------------------------------------------------|---------------|-------------------------|---------------|
| <i>w</i> <sup>1118</sup> (WT)                                                  | 11                | 117.45 $\pm$ 2.09 |               | 89.90 $\pm$ 0.55                                 |               | 1.31 $\pm$ 0.02                                                 |               | 13.18 $\pm$ 0.70        |               |
| <i>gef26</i> <sup>6</sup> /+                                                   | 11                | 116.73 $\pm$ 2.37 | 1             | 90.72 $\pm$ 0.35                                 | 0.985         | 1.29 $\pm$ 0.03                                                 | 0.998         | 12.55 $\pm$ 0.68        | 0.996         |
| <i>rap1</i> <sup>M</sup> /+                                                    | 11                | 120.36 $\pm$ 2.05 | 0.979         | 90.86 $\pm$ 0.33                                 | 0.967         | 1.32 $\pm$ 0.02                                                 | 0.999         | 12.81 $\pm$ 0.67        | 1             |
| <i>fmr1</i> <sup><math>\Delta 50</math></sup> /+                               | 14                | 121.36 $\pm$ 1.92 | 0.908         | 90.50 $\pm$ 0.38                                 | 0.996         | 1.34 $\pm$ 0.02                                                 | 0.968         | 12.64 $\pm$ 0.68        | 0.997         |
| <i>gef26</i> <sup>6</sup> /+; <i>fmr1</i> <sup><math>\Delta 50</math></sup> /+ | 11                | 149.91 $\pm$ 4.71 | <0.001        | 91.72 $\pm$ 1.09                                 | 0.583         | 1.64 $\pm$ 0.05                                                 | <0.001        | 19.82 $\pm$ 1.29        | <0.001        |
| <i>rap1</i> <sup>M</sup> ,+/+; <i>fmr1</i> <sup><math>\Delta 50</math></sup>   | 13                | 148.60 $\pm$ 2.76 | <0.001        | 90.50 $\pm$ 0.31                                 | 0.997         | 1.64 $\pm$ 0.03                                                 | <0.001        | 21.53 $\pm$ 0.96        | <0.001        |

Fig. 4G

|                                                     | Number of samples | Bouton number     | p value vs WT               | Muscle area ( $\mu\text{m}^2$ ) $\times 10^{-3}$ | p value vs WT               | Bouton number /Muscle area ( $\#/\mu\text{m}^2$ ) $\times 10^3$ | p value vs WT               | Satellite bouton number | p value vs WT               |
|-----------------------------------------------------|-------------------|-------------------|-----------------------------|--------------------------------------------------|-----------------------------|-----------------------------------------------------------------|-----------------------------|-------------------------|-----------------------------|
| <b>Vinblastine (-)</b>                              |                   |                   |                             |                                                  |                             |                                                                 |                             |                         |                             |
| <i>w</i> <sup>1118</sup> (WT)                       | 11                | 115.91 $\pm$ 2.26 |                             | 90.27 $\pm$ 0.78                                 |                             | 1.28 $\pm$ 0.02                                                 |                             | 12.45 $\pm$ 1.54        |                             |
| <i>gef26</i> <sup>6</sup> /Df                       | 10                | 137.70 $\pm$ 0.99 | <0.001                      | 90.02 $\pm$ 0.53                                 | 1                           | 1.53 $\pm$ 0.01                                                 | <0.001                      | 178.40 $\pm$ 0.45       | 0.001                       |
| <i>rap1</i> <sup>M</sup> / <i>rap1</i> <sup>M</sup> | 11                | 150.73 $\pm$ 2.77 | <0.001                      | 89.75 $\pm$ 0.33                                 | 0.998                       | 1.68 $\pm$ 0.03                                                 | <0.001                      | 20.82 $\pm$ 1.21        | <0.001                      |
| <b>Vinblastine (+)</b>                              |                   |                   |                             |                                                  |                             |                                                                 |                             |                         |                             |
|                                                     |                   |                   | p value vs WT (non-treated) |                                                  | p value vs WT (non-treated) |                                                                 | p value vs WT (non-treated) |                         | p value vs WT (non-treated) |
| <i>w</i> <sup>1118</sup> (WT)                       | 11                | 120.54 $\pm$ 2.72 | 0.757                       | 90.51 $\pm$ 0.59                                 | 1                           | 1.33 $\pm$ 0.03                                                 | 0.801                       | 12.81 $\pm$ 0.97        | 1                           |
| <i>gef26</i> <sup>6</sup> /Df                       | 15                | 122.86 $\pm$ 2.19 | 0.221                       | 90.12 $\pm$ 0.37                                 | 1                           | 1.36 $\pm$ 0.02                                                 | 0.234                       | 12.93 $\pm$ 0.66        | 1                           |
| <i>rap1</i> <sup>M</sup> / <i>rap1</i> <sup>M</sup> | 14                | 124.57 $\pm$ 2.61 | 0.066                       | 90.64 $\pm$ 0.51                                 | 1                           | 1.37 $\pm$ 0.03                                                 | 0.133                       | 14.50 $\pm$ 1.05        | 0.793                       |
