# Supplementary material for: The Rap activator Gef26 regulates synaptic growth and neuronal survival via inhibition of BMP signaling
Source: PubMed Central journal article supplement (PMC5745669; doi:10.1186/s13041-017-0342-7), 2017-12-28
Supplement: 13041_2017_342_MOESM9_ESM.pdf [file 13041_2017_342_MOESM9_ESM.pdf]

**Table S7. Quantification of NMJ parameters for experiments in Fig. 5B.**

|                                                                     | Number of samples | Bouton number     | p value vs WT | Muscle area ( $\mu\text{m}^2$ ) $\times 10^{-3}$ | p value vs WT | Bouton number /Muscle area ( $\#/\mu\text{m}^2$ ) $\times 10^3$ | p value vs WT | Satellite bouton number | p value vs WT |
|---------------------------------------------------------------------|-------------------|-------------------|---------------|--------------------------------------------------|---------------|-----------------------------------------------------------------|---------------|-------------------------|---------------|
| <i>w<sup>1118</sup></i> (WT)                                        | 10                | 120.39 $\pm$ 2.66 |               | 87.25 $\pm$ 3.47                                 |               | 1.40 $\pm$ 0.07                                                 |               | 14.29 $\pm$ 0.93        |               |
| <i>gef26<sup>6</sup>/+</i>                                          | 10                | 118.30 $\pm$ 2.98 | 0.996         | 91.05 $\pm$ 2.09                                 | n.s           | 1.30 $\pm$ 0.03                                                 | 0.545         | 14.50 $\pm$ 0.65        | 1             |
| <i>endoA<sup><math>\Delta 4</math></sup>/+</i>                      | 10                | 132.10 $\pm$ 3.31 | 0.075         | 90.21 $\pm$ 0.79                                 | n.s           | 1.46 $\pm$ 0.03                                                 | 0.906         | 15.70 $\pm$ 0.52        | 0.843         |
| <i>dap160<sup><math>\Delta 1</math></sup>/+</i>                     | 13                | 120.85 $\pm$ 1.55 | 1             | 88.56 $\pm$ 0.91                                 | n.s           | 1.36 $\pm$ 0.01                                                 | 0.539         | 13.31 $\pm$ 0.44        | 0.947         |
| <i>nwk<sup>2</sup>/+</i>                                            | 9                 | 124.22 $\pm$ 5.05 | 0.995         | 87.56 $\pm$ 1.00                                 | n.s           | 1.42 $\pm$ 0.05                                                 | 1             | 16.89 $\pm$ 2.19        | 0.663         |
| <i>gef26<sup>6</sup>/+; endoA<sup><math>\Delta 4</math></sup>/+</i> | 15                | 176.27 $\pm$ 3.26 | <0.001        | 89.03 $\pm$ 0.67                                 | n.s           | 1.98 $\pm$ 0.04                                                 | <0.001        | 25.00 $\pm$ 1.05        | <0.001        |
| <i>gef26<sup>6</sup>/dap160<sup><math>\Delta 1</math></sup></i>     | 15                | 151.57 $\pm$ 2.96 | <0.001        | 88.95 $\pm$ 0.85                                 | n.s           | 1.71 $\pm$ 0.04                                                 | <0.001        | 19.14 $\pm$ 0.82        | <0.001        |
| <i>gef26<sup>6</sup>/+; nwk<sup>2</sup>/+</i>                       | 14                | 113.43 $\pm$ 3.87 | 0.786         | 86.82 $\pm$ 0.98                                 | n.s           | 1.30 $\pm$ 0.04                                                 | 0.666         | 12.29 $\pm$ 0.77        | 0.805         |
